# Supplementary material for: Antibody-mediated blockade of the IL23 receptor destabilizes intratumoral regulatory T cells and enhances immunotherapy
Source: PubMed Central journal article supplement — Proc Natl Acad Sci U S A. 2022 Apr 28;119(18):e2200757119. doi: 10.1073/pnas.2200757119 (PMC9170135; doi:10.1073/pnas.2200757119), 2022-04-28
Supplement: pnas.2200757119.sapp.pdf [file pnas.2200757119.sapp.pdf]

## **Supplementary Information for**

Antibody-mediated blockade of the IL-23 receptor destabilizes intratumoral regulatory T cells and enhances immunotherapy.

Andrew E. Wight, Jessica M. Sido, Sandrine Degryse, Lin Ao, Hidetoshi Nakagawa, Yiguo Qiu, Xianli Shen, Oba Oseghali, Hye-Jung Kim, Harvey Cantor

Harvey Cantor

Email: [Harvey\\_Cantor@dfci.harvard.edu](mailto:Harvey_Cantor@dfci.harvard.edu)

### **This PDF file includes:**

Supplementary Figures and Legends to S1 to S5

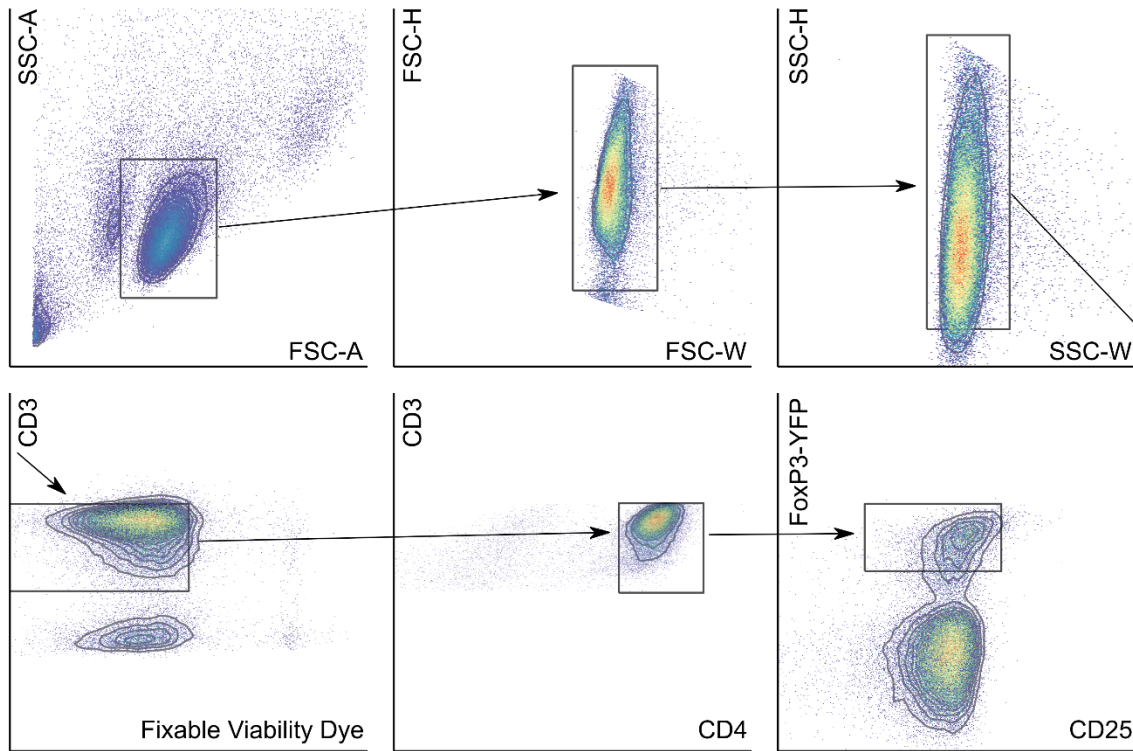

**Fig. S1. Treg sorting strategy** (related to Figs. 1, 2, and 3).

After magnetic depletion of Ter119<sup>+</sup> cells (RBCs), B220<sup>+</sup> cells (B cells & pDCs), and CD8a<sup>+</sup> cells (CD8 T cells & CD8a<sup>+</sup> DCs), cells from FoxP3-YFP reporter mice were sorted on a FACS AriaIII. Lymphocytes were identified and passed through two doublet-discrimination filters, then sorted on live T cells by fixable viability stain and CD3, CD4<sup>+</sup> T cells by CD4 expression, and finally Treg were isolated by YFP expression. Example plots are taken from a tumor-infiltrating lymphocyte sample.

| Gene      | logFC | PValue | Annotation          | Reference | Notes                                                           |
|-----------|-------|--------|---------------------|-----------|-----------------------------------------------------------------|
| Tnfrsf11a | 7.71  | 0.0022 | Proinflammatory/Th1 | 1         | Induced in destabilized Treg                                    |
| Tnfrsf21  | 5.92  | 0.0015 | Proinflammatory/Th1 | 2         | Suppresses Th2, improves CD4 migration to inflammatory sites    |
| Fgr       | 5.64  | 0.0061 | Proinflammatory/Th1 | 3         | Src kinase required for generation of inflammatory environments |
| Socs5     | 4.67  | 0.0056 | Proinflammatory/Th1 | 4         | Favours Th1 program over Th2                                    |
| Socs4     | 3.9   | 0.018  | Proinflammatory/Th1 | 5         | Required for antiviral CD8 T cell recruitment                   |
| Il18rap   | 3.8   | 0.0233 | Proinflammatory/Th1 | 6         | Involved in inflammatory IL18 signaling                         |
| Cx3cr1    | 3.66  | 0.015  | Other               | NA        | NA                                                              |
| Taok2     | 3.34  | 0.0003 | Other               | NA        | NA                                                              |
| Itga5     | 3.03  | 0.0221 | Other               | NA        | NA                                                              |
| Bcl2      | 3.01  | 0.0274 | Other               | NA        | NA                                                              |
| Tcf7l2    | 2.91  | 0.0251 | Other               | NA        | NA                                                              |
| Il15      | 2.88  | 0.0462 | Proinflammatory/Th1 | NA        | Promotes NK cells and CD8 T cells                               |
| Ikbke     | 2.86  | 0.0159 | Other               | NA        | NA                                                              |
| Ccr4      | 2.75  | 0.009  | Other               | NA        | NA                                                              |
| Il12rb2   | 2.49  | 0.0317 | Proinflammatory/Th1 | 7         | Induces STAT4 signaling and IFNg production                     |
| Traf3     | 2.4   | 0.0031 | Proinflammatory/Th1 | 8         | Required for TCR signaling                                      |
| Tollip    | 2.34  | 0.0099 | Other               | NA        | NA                                                              |
| Ifngr2    | 2.24  | 0.0396 | Proinflammatory/Th1 | 9         | Required for IFNg-mediated immune responses                     |
| Tnfsf10   | 2.17  | 0.0072 | Proinflammatory/Th1 | 10        | Promotes cancer apoptosis                                       |
| Taok3     | 2.1   | 0.0065 | Other               | NA        | NA                                                              |
| Syk       | 1.99  | 0.0341 | Other               | NA        | NA                                                              |
| Irak4     | 1.68  | 0.0074 | Proinflammatory/Th1 | 11        | Essential for IL18-mediated anti-tumor responses                |
| Nfkb2     | 1.65  | 0.0154 | Other               | NA        | NA                                                              |
| Lck       | 1.42  | 0.0158 | Other               | NA        | NA                                                              |
| Nfkb1     | -1.67 | 0.0045 | Other               | NA        | NA                                                              |
| Lta       | -1.72 | 0.0314 | Other               | NA        | NA                                                              |
| Mapk14    | -1.89 | 0.0444 | Regulatory/Th2      | 12        | Expressed as cells acquire Treg phenotype                       |
| Socs2     | -1.9  | 0.0236 | Regulatory/Th2      | 13        | Promotes Treg stability                                         |
| Itga4     | -2.06 | 0.0141 | Other               | NA        | NA                                                              |
| Ep300     | -2.37 | 0.0435 | Regulatory/Th2      | 14        | Stabilizes Treg phenotype                                       |
| Map3k3    | -2.57 | 0.0234 | Other               | NA        | NA                                                              |
| Mapk3     | -3.07 | 0.028  | Regulatory/Th2      | 14        | Favours Treg over Th17 development                              |
| Il1r1     | -3.2  | 0.0453 | Regulatory/Th2      | 15        | Enhances Th2 and Treg functions                                 |
| Smad2     | -3.29 | 0.0194 | Regulatory/Th2      | 16        | Mediates TGFb signaling, promotes Treg, suppresses IFNg         |
| Tec       | -3.49 | 0.0191 | Regulatory/Th2      | 17        | Suppresses IL23R expression and Th17 phenotype                  |
| Bid       | -3.62 | 0.0376 | Other               | NA        | NA                                                              |
| Il17rb    | -3.79 | 0.0476 | Other               | NA        | NA                                                              |
| Traf6     | -3.79 | 0.0035 | Regulatory/Th2      | 18        | Supports Treg stability                                         |
| Tnfrsf14  | -4.51 | 0.041  | Other               | NA        | NA                                                              |
| Il11      | -7.62 | 0.0005 | Regulatory/Th2      | 19        | Suppresses anti-tumor CD4 responses                             |

**Fig. S2. Table of significant DEG and their inflammatory/regulatory annotation** (related to Figure 2). See supplemental references for citations supporting functional annotation.

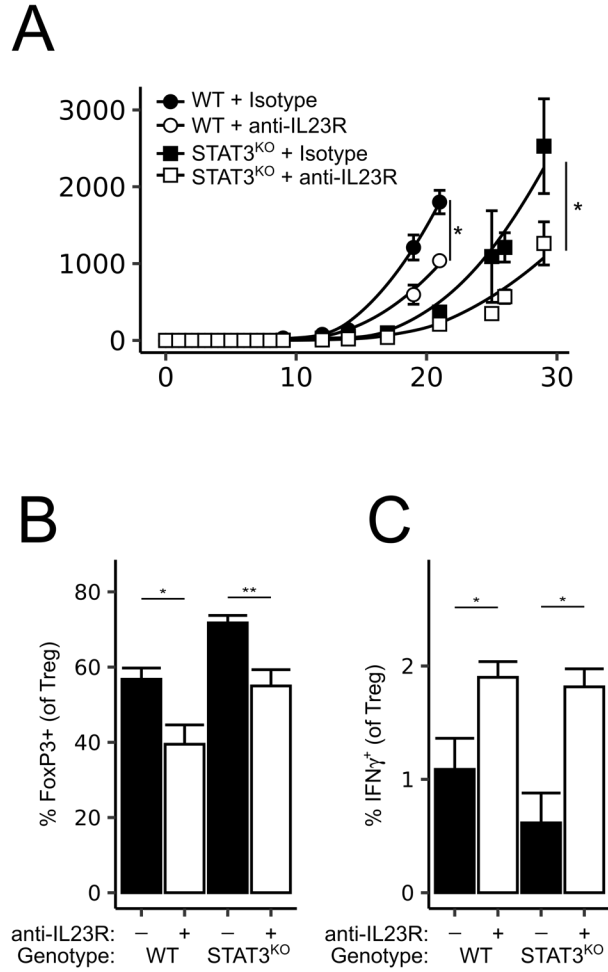

**Fig. S3. IL23R interference operates independent from STAT3 signaling** (related to Figure 2).

**(A)** Tumor growth curves in WT or Treg-specific STAT3<sup>KO</sup> mice treated with anti-IL23R antibody or isotype control as in Figure 3. **(B)** FoxP3 expression and **(C)** IFN $\gamma$  expression on tumor-infiltrating Treg at tumor endpoint (D21 for WT, D29 for STAT3KO).

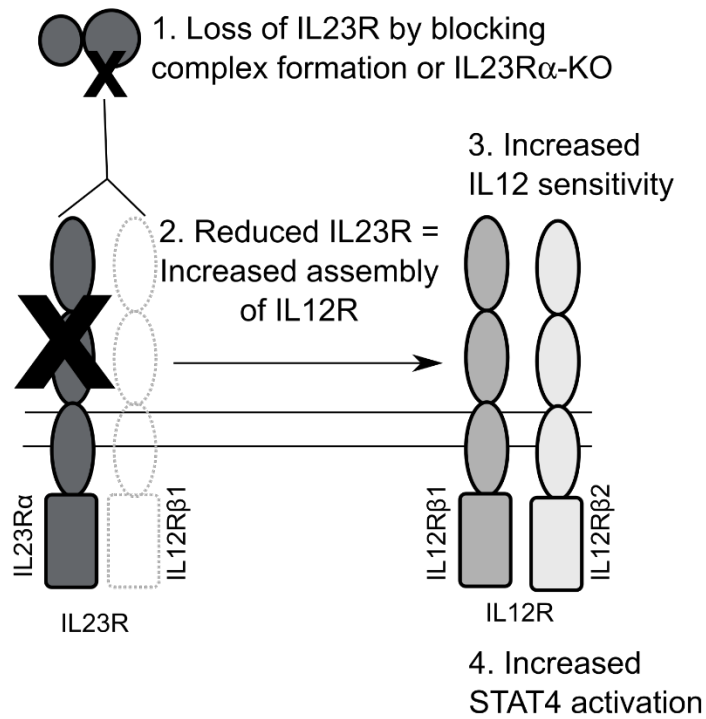

**Fig. S4. : Schematic showing the functional relationship between IL23R and IL12R.**

IL23R and IL12R compete for a shared signaling chain, IL12R $\beta$ 1. Therefore, (1) interfering with IL23R $\alpha$  (2) liberates IL12R $\beta$ 1 to assemble more IL12R complexes. This increased surface assembly of high-affinity IL12 receptors (3) increases IL12 sensitivity in the cell, (4) leading to increased STAT4 activation and expression of STAT4-regulated genes like IFN $\gamma$ .

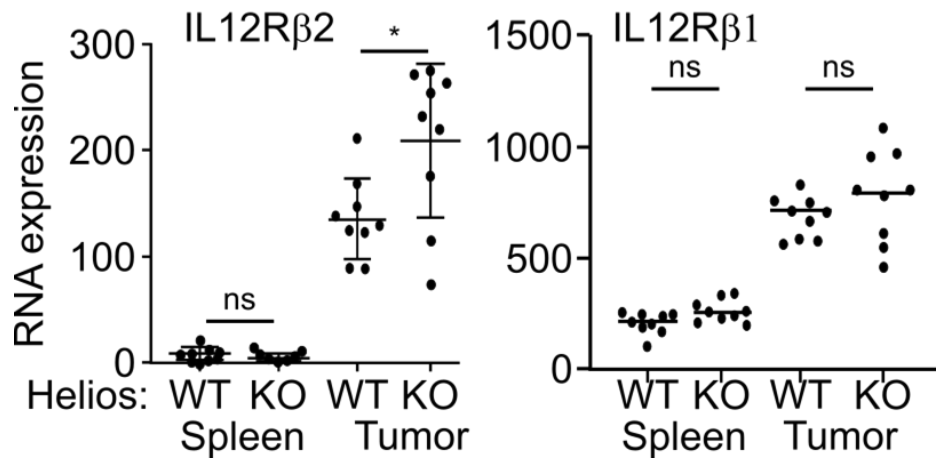

**Fig. S5. Helios deficiency induces *Il12rb2* but not *Il12rb1* mRNA.**

Re-analysis of RNA-Seq data generated in Yates et al. (ref. 4 in the ms). Normalized read-counts shown for each indicated gene. Mean  $\pm$  SEM is shown, with each point representing a single mouse. Statistical comparisons done by Wilcoxon test.

## SI References

1. M. Doebele, *et al.*, CD83 expression is essential for Treg cell differentiation and stability. *JCI Insight* **3** (2019).
2. M. Klíma, A. Broučková, M. Koc, L. Anděra, T-cell activation triggers death receptor-6 expression in a NF- $\kappa$ B and NF-AT dependent manner. *Mol. Immunol.* **48**, 1439–1447 (2011).
3. M. Kovács, *et al.*, The Src family kinases Hck, Fgr, and Lyn are critical for the generation of the in vivo inflammatory environment without a direct role in leukocyte recruitment. *J. Exp. Med.* **211**, 1993 (2014).
4. D. C. Palmer, N. P. Restifo, Suppressors of Cytokine Signaling (SOCS) in T cell differentiation, maturation, and function. *Trends Immunol.* **30**, 592 (2009).
5. L. Kedzierski, *et al.*, Suppressor of Cytokine Signaling 4 (SOCS4) Protects against Severe Cytokine Storm and Enhances Viral Clearance during Influenza Infection. *PLOS Pathog.* **10**, e1004134 (2014).
6. O. J. Harrison, *et al.*, Epithelial-derived IL-18 regulates Th17 cell differentiation and Foxp3+ Treg cell function in the intestine. *Mucosal Immunol.* **8**, 1226 (2015).
7. A. Becskei, M. J. Grusby, Contribution of IL-12R mediated feedback loop to Th1 cell differentiation. *FEBS Lett.* **581**, 5199–5206 (2007).
8. P. Xie, Z. J. Kraus, L. L. Stunz, Y. Liu, G. A. Bishop, TNF Receptor-Associated Factor 3 Is Required for T Cell-Mediated Immunity and TCR/CD28 Signaling. *J. Immunol.* **186**, 143–155 (2011).
9. B. Lu, *et al.*, Targeted disruption of the interferon- $\gamma$  receptor 2 gene results in severe immune defects in mice. *Proc. Natl. Acad. Sci.* **95**, 8233–8238 (1998).
10. S. von Karstedt, A. Montinaro, H. Walczak, Exploring the TRAILs less travelled: TRAIL in cancer biology and therapy. *Nat. Rev. Cancer* **2017** *17*, 352–366 (2017).
11. N. Suzuki, *et al.*, IL-1 receptor-associated kinase 4 is essential for IL-18-mediated NK and Th1 cell responses. *J. Immunol.* **170**, 4031–4035 (2003).
12. W. W. Hansen, *et al.*, Inflammation in vivo is modulated by GPR83 isoform-4 but not GPR83 isoform-1 expression in regulatory T cells. *Genes Immun.* **2010** *11*, 357–361 (2010).
13. C. A. Knosp, *et al.*, Regulation of Foxp3+ inducible regulatory T cell stability by SOCS2. *J. Immunol.* **190**, 3235–3245 (2013).
14. Y. Liu, *et al.*, Inhibition of p300 impairs Foxp3+ T regulatory cell function and promotes antitumor immunity. *Nat. Med.* **19**, 1173–1177 (2013).
15. B. Griesenauer, S. Paczesny, The ST2/IL-33 axis in immune cells during inflammatory diseases. *Front. Immunol.* **8**, 475 (2017).
16. T. Takimoto, *et al.*, Smad2 and Smad3 Are Redundantly Essential for the TGF- $\beta$ -Mediated Regulation of Regulatory T Plasticity and Th1 Development. *J. Immunol.* **185**, 842–855 (2010).
17. N. Boucheron, *et al.*, The Protein Tyrosine Kinase Tec Regulates a CD44<sup>high</sup>CD62L<sup>-</sup> Th17 Subset. *J. Immunol.* **185**, 5111–5119 (2010).
18. G. Muto, *et al.*, TRAF6 is essential for maintenance of regulatory T cells that suppress Th2 type autoimmunity. *PLoS One* **8** (2013).
19. J. Huynh, *et al.*, Host IL11 Signaling Suppresses CD4+ T cell-Mediated Antitumor Responses to Colon Cancer in Mice. *Cancer Immunol. Res.* **9**, 735–747 (2021).
